# Supplementary material for: hTERT promotes cell adhesion and migration independent of telomerase activity
Source: PubMed Central journal article supplement (PMC4789728; doi:10.1038/srep22886), 2016-03-14
Supplement: srep22886-s1.pdf [file srep22886-s1.pdf]

## Supplementary information

### **hTERT promotes cell adhesion and migration independent of telomerase activity**

Haiying Liu<sup>1,2,3</sup>, Qianqian Liu<sup>1,2,3</sup>, Yuanlong Ge<sup>1,2</sup>, Qi Zhao<sup>1</sup>, Xiaohui Zheng<sup>1,2</sup>, Yong Zhao<sup>1,2</sup> \*

<sup>1</sup> Key Laboratory of Gene Engineering of the Ministry of Education, School of Life Sciences, Sun Yat-sen University, Guangzhou 510006 P. R. China;

<sup>2</sup> Collaborative Innovation Center of High Performance Computing, National University of Defense Technology, Changsha 410073, P. R. China;

<sup>3</sup> Those authors contributed equally to this work.

\* To whom correspondence should be addressed:

YZ, E-mail: zhaoy82@mail.sysu.edu.cn, Tel: 86-203-994-3401, Fax: 86-203-994-3778

Figure S1

a

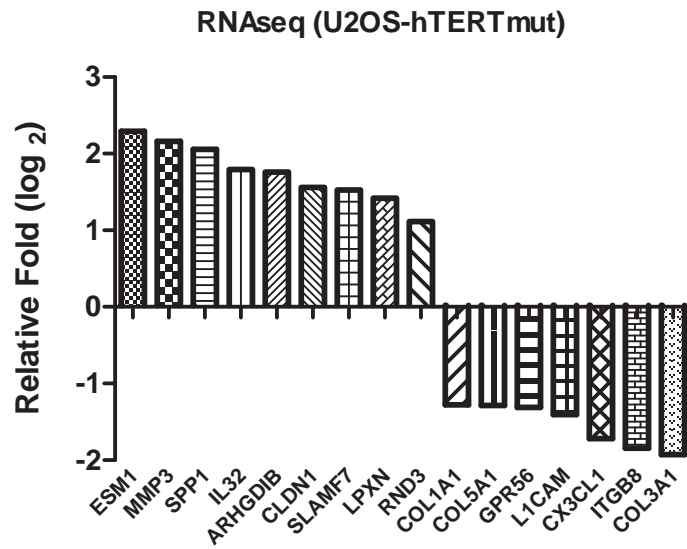

b

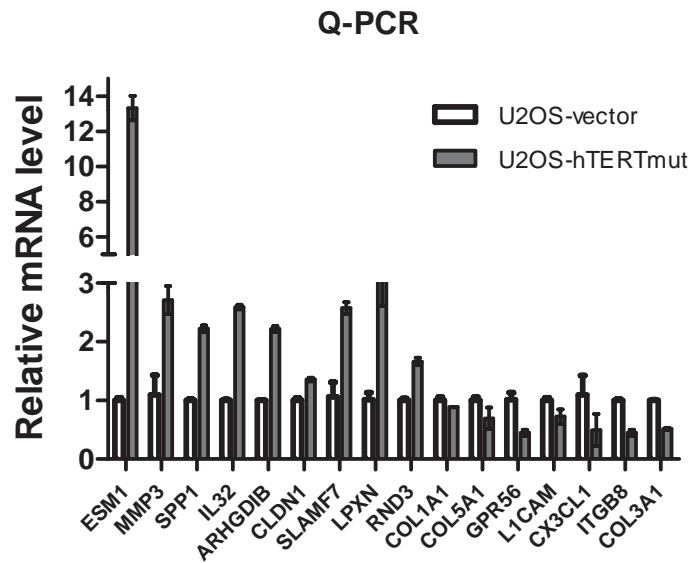

c

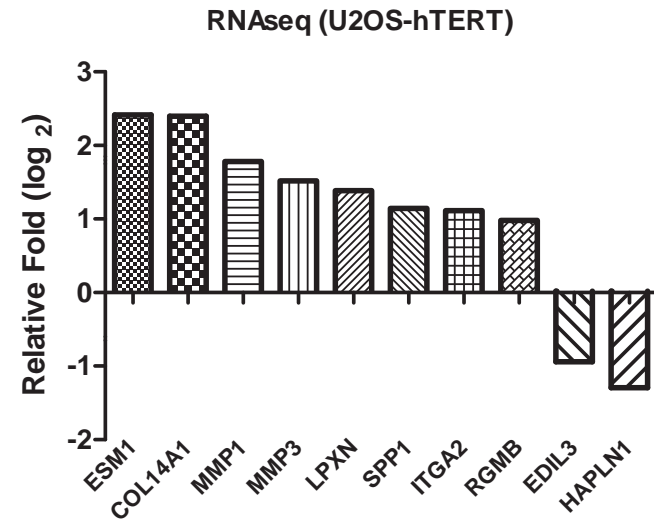

d

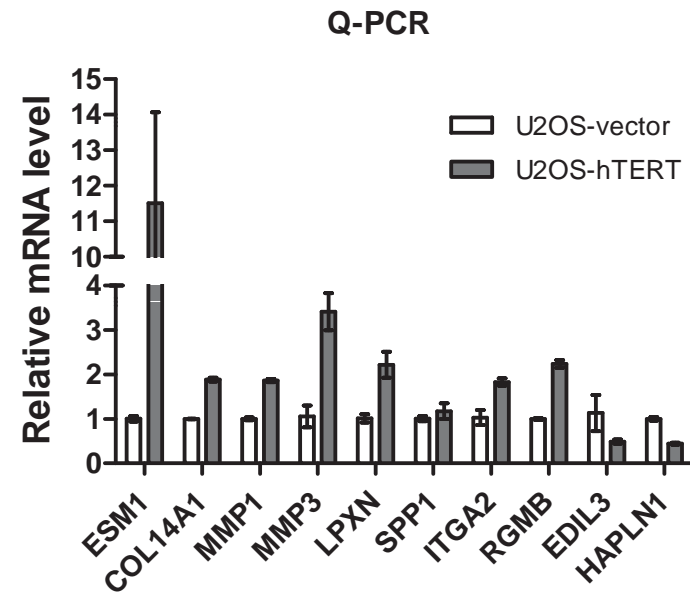

Figure S2

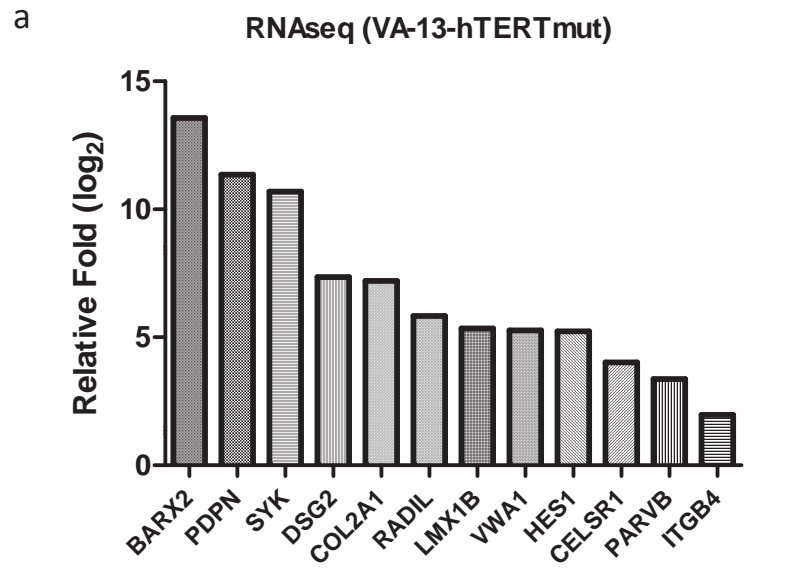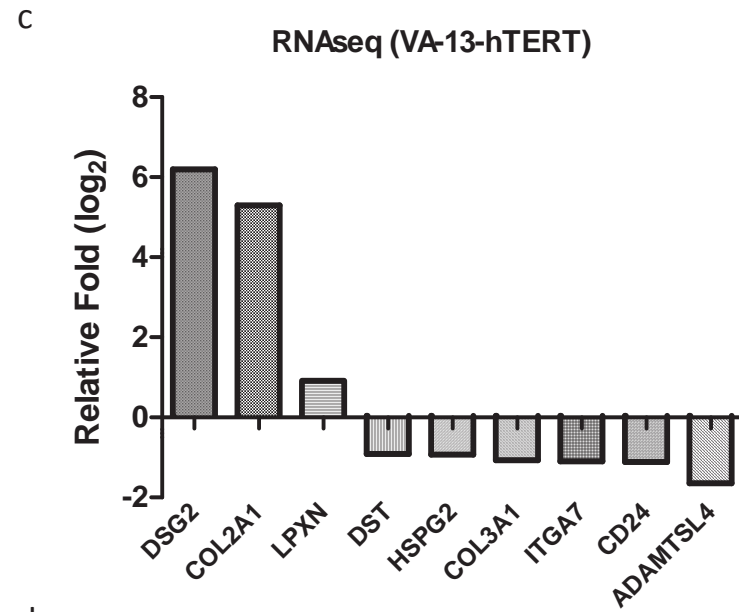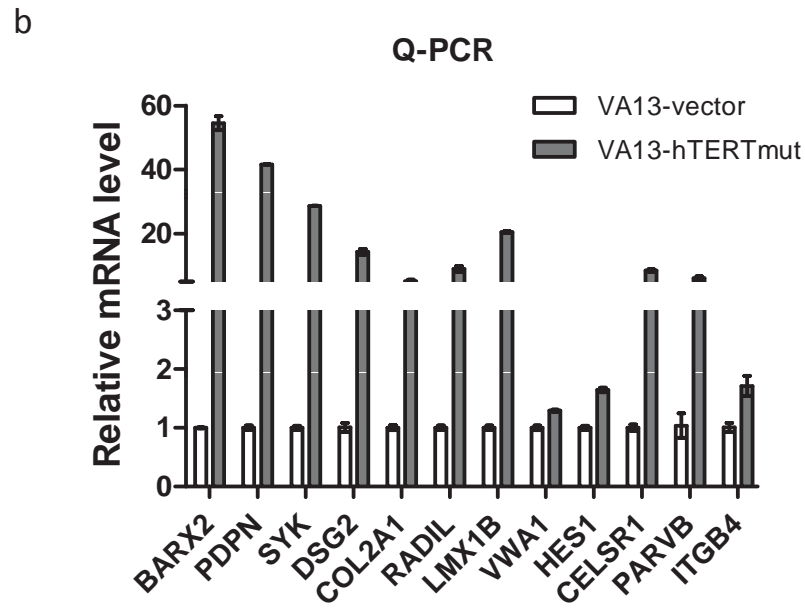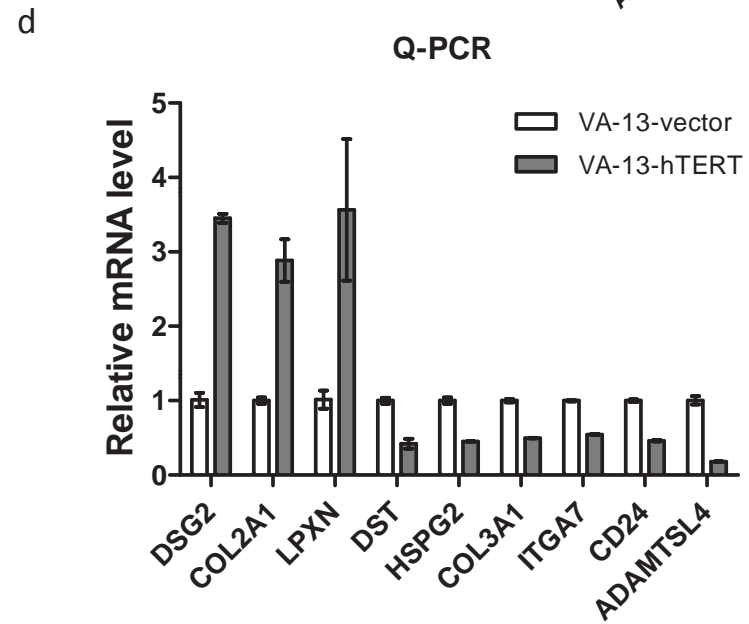

## **Figure legends**

**Figure S1:** RNA-seq results were confirmed by qPCR. 16 (a and b) and 10 (c and d) differentially expressed genes were selected from U2OS cells expressing hTERTmut and hTERT, respectively.

**Figure S2:** RNA-seq results were confirmed by qPCR. 12 (a and b) and 9 (c and d) differentially expressed genes were selected from VA13 cells expressing hTERTmut and hTERT, respectively.

**Table S1 Dysregulated genes in U2OS cells**

| U2OS+hTERT   |                |       | U2OS+hTERTmut |                |       |
|--------------|----------------|-------|---------------|----------------|-------|
| Gene         | log2FoldChange | padj  | Gene          | log2FoldChange | padj  |
| TERT         | 9.924          | 0.000 | TERT          | 10.098         | 0.000 |
| LOC100505875 | 5.174          | 0.001 | MSR1          | 9.873          | 0.005 |
| TNFSF8       | 3.763          | 0.000 | LOC100505875  | 6.564          | 0.000 |
| IGFN1        | 2.953          | 0.045 | TNFSF8        | 4.082          | 0.000 |
| KYNU         | 2.936          | 0.000 | PRR9          | 4.028          | 0.027 |
| IL8          | 2.514          | 0.000 | BCL2A1        | 3.745          | 0.020 |
| ESM1         | 2.413          | 0.000 | BEST3         | 3.702          | 0.007 |
| COL14A1      | 2.398          | 0.045 | SLC28A3       | 3.566          | 0.037 |
| MYCT1        | 2.251          | 0.002 | IL8           | 3.198          | 0.000 |
| IL13RA2      | 2.160          | 0.000 | MYCT1         | 3.117          | 0.000 |
| MMP1         | 1.782          | 0.011 | IGFN1         | 3.111          | 0.047 |
| LINC00520    | 1.668          | 0.007 | TRAF1         | 3.023          | 0.039 |
| VEPH1        | 1.637          | 0.036 | KYNU          | 2.962          | 0.000 |
| MMP3         | 1.518          | 0.000 | IL13RA2       | 2.695          | 0.000 |
| RGS4         | 1.470          | 0.001 | MYOZ2         | 2.688          | 0.026 |
| FGF5         | 1.394          | 0.000 | GAGE1         | 2.587          | 0.001 |
| LPXN         | 1.387          | 0.001 | ESM1          | 2.295          | 0.000 |
| SP140        | 1.360          | 0.028 | LOC100288077  | 2.278          | 0.015 |
| LOC152225    | 1.292          | 0.004 | HSPA6         | 2.271          | 0.004 |
| PTX3         | 1.221          | 0.046 | LINC00520     | 2.185          | 0.000 |
| ADAMTS6      | 1.168          | 0.002 | MMP3          | 2.160          | 0.000 |
| SCG5         | 1.168          | 0.002 | SPP1          | 2.055          | 0.000 |
| PAPPA2       | 1.149          | 0.039 | VEPH1         | 1.923          | 0.024 |
| ANTXR2       | 1.144          | 0.002 | NLRP1         | 1.910          | 0.003 |
| SPP1         | 1.142          | 0.012 | SP140         | 1.829          | 0.001 |
| ITGA2        | 1.115          | 0.001 | IL32          | 1.795          | 0.007 |
| ELTD1        | 1.091          | 0.027 | TMEM71        | 1.791          | 0.032 |
| RGMB         | 0.983          | 0.037 | BIRC3         | 1.773          | 0.029 |
| HMGA2        | 0.899          | 0.017 | ARHGDI3       | 1.761          | 0.001 |
| HSPB1        | -0.811         | 0.049 | SRGN          | 1.722          | 0.000 |
| FADS2        | -0.858         | 0.028 | DUSP5         | 1.662          | 0.001 |
| COL1A1       | -0.859         | 0.026 | TNFAIP3       | 1.624          | 0.009 |
| KRT17        | -0.893         | 0.017 | UCA1          | 1.612          | 0.005 |
| CSDC2        | -0.922         | 0.046 | LCP1          | 1.604          | 0.000 |
| EDIL3        | -0.941         | 0.020 | CLDN1         | 1.560          | 0.026 |
| FAM19A5      | -0.999         | 0.045 | PAPPA2        | 1.529          | 0.002 |
| MN1          | -1.004         | 0.035 | SLAMF7        | 1.528          | 0.013 |
| CREB3L1      | -1.106         | 0.009 | RIMS2         | 1.525          | 0.019 |
| TNNT2        | -1.183         | 0.014 | FGF5          | 1.473          | 0.000 |
| PIEZO2       | -1.211         | 0.046 | LPXN          | 1.418          | 0.007 |
| DRD1         | -1.220         | 0.048 | CD163L1       | 1.406          | 0.002 |

|          |        |       |           |        |       |
|----------|--------|-------|-----------|--------|-------|
| HAPLN1   | -1.293 | 0.000 | KISS1     | 1.385  | 0.000 |
| LBH      | -1.302 | 0.000 | KRT34     | 1.368  | 0.003 |
| FOSB     | -1.360 | 0.001 | SCG5      | 1.352  | 0.001 |
| BMP4     | -1.400 | 0.000 | TMEM154   | 1.332  | 0.026 |
| FLJ22184 | -1.574 | 0.026 | HMOX1     | 1.326  | 0.001 |
| CXCR7    | -1.589 | 0.020 | LOC152225 | 1.303  | 0.021 |
| EDN2     | -1.630 | 0.007 | HKDC1     | 1.300  | 0.042 |
| TNNC1    | -1.726 | 0.001 | MAFF      | 1.282  | 0.009 |
|          |        |       | GLIPR1    | 1.187  | 0.024 |
|          |        |       | CSTA      | 1.146  | 0.021 |
|          |        |       | HDAC9     | 1.144  | 0.017 |
|          |        |       | ANTXR2    | 1.133  | 0.009 |
|          |        |       | RND3      | 1.114  | 0.004 |
|          |        |       | EFR3B     | 1.083  | 0.009 |
|          |        |       | ADAMTS6   | 1.061  | 0.033 |
|          |        |       | VGLL3     | 1.030  | 0.027 |
|          |        |       | LOX       | 1.015  | 0.009 |
|          |        |       | PPP1R15A  | 0.972  | 0.023 |
|          |        |       | LIMCH1    | 0.931  | 0.021 |
|          |        |       | TXNRD1    | 0.929  | 0.026 |
|          |        |       | SYTL3     | 0.928  | 0.044 |
|          |        |       | SLC7A11   | 0.883  | 0.032 |
|          |        |       | RHOBTB3   | -0.917 | 0.027 |
|          |        |       | OSBPL10   | -0.931 | 0.037 |
|          |        |       | FADS2     | -0.938 | 0.023 |
|          |        |       | ENC1      | -0.962 | 0.021 |
|          |        |       | LOXL4     | -0.964 | 0.047 |
|          |        |       | COL11A1   | -0.969 | 0.038 |
|          |        |       | ODZ2      | -1.001 | 0.009 |
|          |        |       | COL6A3    | -1.037 | 0.008 |
|          |        |       | SERPINA1  | -1.112 | 0.013 |
|          |        |       | CYP24A1   | -1.132 | 0.010 |
|          |        |       | PMEPA1    | -1.142 | 0.001 |
|          |        |       | SEMA6B    | -1.157 | 0.006 |
|          |        |       | FAM19A5   | -1.167 | 0.026 |
|          |        |       | TUBA1A    | -1.174 | 0.004 |
|          |        |       | SOX4      | -1.244 | 0.002 |
|          |        |       | ZNF608    | -1.260 | 0.004 |
|          |        |       | COL1A1    | -1.276 | 0.000 |
|          |        |       | COL5A1    | -1.285 | 0.000 |
|          |        |       | GPR56     | -1.309 | 0.032 |
|          |        |       | RBP1      | -1.315 | 0.008 |
|          |        |       | L1CAM     | -1.408 | 0.000 |
|          |        |       | SLIT3     | -1.454 | 0.044 |

|          |        |       |
|----------|--------|-------|
| CRISPLD1 | -1.482 | 0.015 |
| AXIN2    | -1.487 | 0.005 |
| MN1      | -1.522 | 0.000 |
| ARL4C    | -1.529 | 0.000 |
| TRIB2    | -1.531 | 0.000 |
| C9orf84  | -1.543 | 0.018 |
| TNNC1    | -1.543 | 0.029 |
| COL9A2   | -1.568 | 0.026 |
| RUNX2    | -1.590 | 0.023 |
| LRRN1    | -1.609 | 0.000 |
| BMP4     | -1.617 | 0.000 |
| SLCO2A1  | -1.662 | 0.005 |
| CX3CL1   | -1.717 | 0.032 |
| HR       | -1.742 | 0.000 |
| EDIL3    | -1.752 | 0.000 |
| KRT17    | -1.826 | 0.000 |
| ITGB8    | -1.843 | 0.000 |
| GUCY1A2  | -1.888 | 0.000 |
| DBP      | -1.921 | 0.014 |
| COL3A1   | -1.929 | 0.025 |
| LBH      | -1.934 | 0.000 |
| HAS2     | -2.011 | 0.006 |
| SOX2     | -2.128 | 0.013 |
| KRT14    | -2.233 | 0.003 |
| RNF43    | -2.233 | 0.003 |
| CXCR7    | -2.308 | 0.003 |
| PODNL1   | -2.370 | 0.024 |
| HSD17B3  | -2.478 | 0.001 |
| OLFML2A  | -2.487 | 0.001 |
| IGFBP5   | -2.507 | 0.000 |
| CXCL14   | -2.568 | 0.003 |
| HAPLN1   | -2.643 | 0.000 |
| DRD1     | -2.648 | 0.000 |
| SOSTDC1  | -3.197 | 0.032 |

---

**Table S2 Dysregulated genes in VA-13 cells**

| VA-13-hTERT |                |       | VA-13+hTERTmut |                |       |
|-------------|----------------|-------|----------------|----------------|-------|
| Gene        | log2FoldChange | padj  | Gene           | log2FoldChange | padj  |
| CA2         | 15.074         | 0.000 | CA2            | 16.844         | 0.000 |
| GAL         | 13.584         | 0.023 | CHCHD10        | 16.094         | 0.000 |
| CHCHD10     | 13.582         | 0.028 | GAL            | 15.306         | 0.000 |
| HOXD13      | 13.386         | 0.000 | HOXD13         | 14.994         | 0.000 |
| PPP1R14C    | 12.187         | 0.041 | PCSK1N         | 14.821         | 0.000 |
| TUBB4A      | 12.100         | 0.011 | TUBB4A         | 14.398         | 0.000 |
| CDX2        | 11.957         | 0.034 | CHCHD5         | 14.350         | 0.047 |
| PALM        | 10.814         | 0.023 | IRS4           | 14.101         | 0.000 |
| IRS4        | 10.789         | 0.028 | RPP25          | 13.891         | 0.000 |
| DSP         | 10.765         | 0.000 | PPP1R14C       | 13.841         | 0.001 |
| MST4        | 10.706         | 0.001 | HMX1           | 13.833         | 0.000 |
| HS6ST2      | 10.053         | 0.028 | CDX2           | 13.791         | 0.000 |
| TERT        | 10.037         | 0.000 | HAND1          | 13.708         | 0.004 |
| MYH14       | 9.583          | 0.000 | C1orf233       | 13.632         | 0.002 |
| SLAIN1      | 9.304          | 0.041 | C10orf125      | 13.618         | 0.012 |
| ADD2        | 9.010          | 0.016 | GLB1L2         | 13.564         | 0.000 |
| DSG2        | 6.198          | 0.000 | BARX2          | 13.563         | 0.005 |
| WNK2        | 5.571          | 0.002 | HOXD10         | 13.154         | 0.016 |
| EN2         | 5.475          | 0.005 | INA            | 13.135         | 0.000 |
| HOXA10      | 5.470          | 0.005 | SELENBP1       | 12.973         | 0.018 |
| GRB10       | 5.314          | 0.009 | COLEC12        | 12.700         | 0.002 |
| TMEM98      | 5.304          | 0.013 | PALM           | 12.548         | 0.000 |
| COL2A1      | 5.299          | 0.011 | B4GALNT3       | 12.320         | 0.004 |
| CCDC8       | 5.229          | 0.019 | PNMAL1         | 12.227         | 0.000 |
| DPYSL5      | 5.195          | 0.000 | WSCD1          | 12.047         | 0.004 |
| PHYHD1      | 5.182          | 0.022 | EMILIN3        | 11.992         | 0.018 |
| CXorf57     | 5.047          | 0.038 | MATK           | 11.954         | 0.001 |
| NUP210      | 4.537          | 0.000 | GPRC5C         | 11.890         | 0.014 |
| EEF1A2      | 4.495          | 0.000 | DSP            | 11.785         | 0.000 |
| KIF1A       | 4.479          | 0.012 | ZIC5           | 11.711         | 0.035 |
| FLT4        | 4.396          | 0.020 | CAMSAP3        | 11.448         | 0.000 |
| CKB         | 4.004          | 0.000 | PDPN           | 11.351         | 0.003 |
| NTN1        | 3.958          | 0.022 | MYH14          | 11.302         | 0.000 |
| PCSK6       | 3.860          | 0.029 | HS6ST2         | 11.231         | 0.006 |
| HEY1        | 2.603          | 0.001 | MST4           | 11.193         | 0.008 |
| MMP1        | 2.035          | 0.034 | LARGE          | 11.061         | 0.012 |
| MT2A        | 1.112          | 0.002 | ADD2           | 10.759         | 0.000 |
| MT1E        | 0.921          | 0.004 | GPC3           | 10.751         | 0.012 |
| LPXN        | 0.916          | 0.005 | SYK            | 10.691         | 0.000 |
| G0S2        | 0.911          | 0.005 | SLAIN1         | 10.526         | 0.008 |



|          |        |       |          |        |       |
|----------|--------|-------|----------|--------|-------|
| ETV4     | 0.865  | 0.022 | SLC6A15  | 10.480 | 0.015 |
| SPHK1    | 0.824  | 0.019 | TERT     | 10.469 | 0.000 |
| HEG1     | -0.886 | 0.041 | AUTS2    | 10.247 | 0.012 |
| DST      | -0.909 | 0.028 | KCNQ2    | 10.049 | 0.012 |
| HSPG2    | -0.932 | 0.022 | RGMA     | 9.914  | 0.016 |
| MDGA1    | -1.030 | 0.036 | CELF2    | 9.056  | 0.047 |
| COL3A1   | -1.074 | 0.013 | FGFR2    | 8.988  | 0.011 |
| ITGA7    | -1.098 | 0.009 | HOXA10   | 7.423  | 0.000 |
| CD24     | -1.114 | 0.001 | DSG2     | 7.355  | 0.000 |
| NTN4     | -1.120 | 0.023 | TMEM98   | 7.298  | 0.000 |
| MEG3     | -1.186 | 0.001 | COL2A1   | 7.209  | 0.000 |
| MATN2    | -1.300 | 0.001 | EN2      | 7.201  | 0.000 |
| NEAT1    | -1.350 | 0.000 | WNK2     | 7.059  | 0.000 |
| MALAT1   | -1.485 | 0.000 | CCDC8    | 7.047  | 0.000 |
| PDGFRL   | -1.506 | 0.046 | DPYSL5   | 7.017  | 0.000 |
| ADAMTSL4 | -1.648 | 0.000 | HOXD11   | 6.977  | 0.000 |
| LMOD1    | -1.707 | 0.007 | EEF1A2   | 6.856  | 0.000 |
| SCARNA9  | -1.867 | 0.008 | DBNDD1   | 6.812  | 0.000 |
| ALPP     | -1.971 | 0.000 | RNF130   | 6.678  | 0.001 |
| EGR1     | -2.135 | 0.000 | KIF1A    | 6.645  | 0.000 |
| KRT17    | -2.148 | 0.000 | GRB10    | 6.510  | 0.001 |
|          |        |       | PHYHD1   | 6.509  | 0.002 |
|          |        |       | FLT4     | 6.332  | 0.000 |
|          |        |       | CKB      | 6.248  | 0.000 |
|          |        |       | GPC4     | 6.232  | 0.008 |
|          |        |       | KIF26A   | 6.204  | 0.000 |
|          |        |       | NUP210   | 6.172  | 0.000 |
|          |        |       | MSI1     | 6.150  | 0.012 |
|          |        |       | CXorf57  | 6.108  | 0.012 |
|          |        |       | ALX4     | 6.070  | 0.015 |
|          |        |       | NTN1     | 6.070  | 0.000 |
|          |        |       | GNG7     | 6.039  | 0.018 |
|          |        |       | MAF      | 5.979  | 0.020 |
|          |        |       | LINGO1   | 5.878  | 0.033 |
|          |        |       | RADIL    | 5.829  | 0.039 |
|          |        |       | RAB4A    | 5.543  | 0.004 |
|          |        |       | BRSK2    | 5.509  | 0.004 |
|          |        |       | ASS1     | 5.355  | 0.000 |
|          |        |       | LMX1B    | 5.344  | 0.010 |
|          |        |       | VWA1     | 5.265  | 0.015 |
|          |        |       | HES1     | 5.229  | 0.002 |
|          |        |       | LRRC61   | 5.223  | 0.018 |
|          |        |       | B4GALNT4 | 5.221  | 0.018 |
|          |        |       | PCSK6    | 5.209  | 0.002 |

|          |       |       |
|----------|-------|-------|
| DIRAS1   | 5.194 | 0.000 |
| LDOC1    | 5.184 | 0.002 |
| CACNA1H  | 5.144 | 0.003 |
| HTATIP2  | 5.112 | 0.029 |
| PRAME    | 4.986 | 0.047 |
| IGFBP2   | 4.949 | 0.000 |
| BMP7     | 4.914 | 0.000 |
| HOMER2   | 4.886 | 0.012 |
| EPB41L3  | 4.797 | 0.018 |
| PRKCZ    | 4.714 | 0.025 |
| SMOC1    | 4.668 | 0.008 |
| CHD7     | 4.623 | 0.010 |
| UNC5B    | 4.548 | 0.004 |
| NOTCH3   | 4.428 | 0.009 |
| JPH3     | 4.415 | 0.027 |
| NEFL     | 4.371 | 0.033 |
| GPX3     | 4.364 | 0.012 |
| FABP5    | 4.343 | 0.038 |
| ZCCHC12  | 4.176 | 0.000 |
| MAPK8IP2 | 4.136 | 0.000 |
| MYO1D    | 4.135 | 0.016 |
| RHOA     | 4.086 | 0.019 |
| CELSR1   | 4.013 | 0.001 |
| SEMA6A   | 3.835 | 0.018 |
| ALDH1A2  | 3.809 | 0.020 |
| IGSF3    | 3.778 | 0.014 |
| HEY1     | 3.734 | 0.000 |
| RIMS4    | 3.651 | 0.001 |
| SULF2    | 3.571 | 0.004 |
| ACSS1    | 3.547 | 0.047 |
| PARVB    | 3.367 | 0.033 |
| ISYNA1   | 3.253 | 0.000 |
| DMKN     | 3.185 | 0.000 |
| DUSP9    | 3.048 | 0.023 |
| STXBP2   | 2.935 | 0.029 |
| MDK      | 2.909 | 0.004 |
| SALL2    | 2.798 | 0.011 |
| STMN3    | 2.770 | 0.028 |
| SPINT2   | 2.401 | 0.003 |
| H2AFY2   | 2.394 | 0.011 |
| TLE3     | 2.245 | 0.003 |
| ITGB4    | 1.970 | 0.018 |
| SHISA2   | 1.902 | 0.010 |
| GLUL     | 1.480 | 0.010 |

|          |        |       |
|----------|--------|-------|
| C19orf63 | 1.426  | 0.017 |
| NEAT1    | -1.530 | 0.031 |
| F3       | -1.600 | 0.019 |
| KRT17    | -1.616 | 0.029 |
| MALAT1   | -2.039 | 0.001 |

---

**Table S3 Genes related to cell adhesion in U2OS**

| Biology Process                                  | Genes                                           |                                                                                                                    |
|--------------------------------------------------|-------------------------------------------------|--------------------------------------------------------------------------------------------------------------------|
|                                                  | U2OS-hTERT                                      | U2OS-hTERTmut                                                                                                      |
| G0:0030155~regulation of cell adhesion           | IL8, ITGA2, EDIL3, COL1A1, SPP1                 | IL8, L1CAM, EDIL3, COL1A1, CX3CL1, SPP1, ARHGDIB                                                                   |
| G0:0032963~collagen metabolic process            | COL1A1, MMP3, MMP1                              | COL3A1, COL1A1, MMP3, COL5A1                                                                                       |
| G0:0010810~regulation of cell-substrate adhesion | EDIL3, COL1A1, SPP1                             | EDIL3, COL1A1, SPP1                                                                                                |
| G0:0007155~cell adhesion                         | HAPLN1, RGMB, LPXN, COL14A1, ITGA2, EDIL3, SPP1 | HAPLN1, COL3A1, IL32, L1CAM, CX3CL1, SLAMF7, EDIL3, COL5A1, RND3, LPXN, ITGB8, COL6A3, GPR56, CLDN1, COL11A1, SPP1 |
| G0:0022610~biological adhesion                   | HAPLN1, RGMB, LPXN, COL14A1, ITGA2, EDIL3, SPP1 | HAPLN1, COL3A1, IL32, L1CAM, CX3CL1, SLAMF7, EDIL3, COL5A1, RND3, LPXN, ITGB8, COL6A3, GPR56, CLDN1, COL11A1, SPP1 |
| G0:0045785~positive regulation of cell adhesion  | ITGA2, EDIL3, SPP1                              | L1CAM, EDIL3, CX3CL1, SPP1                                                                                         |

**Table S4 Genes related to cell adhesion in VA-13**

| Biology Process                              | Genes                                               |                                                                   |
|----------------------------------------------|-----------------------------------------------------|-------------------------------------------------------------------|
|                                              | VA-13-hTERT                                         | VA-13-hTERTmut                                                    |
| G0:0030198~extracellular matrix organization | ADAMTSL4, COL3A1, HSPG2, COL2A1                     | LMX1B, SMOC1, COL2A1, VWA1                                        |
| G0:0007155~cell adhesion                     | LPXN, DSG2, COL3A1, ITGA7, HSPG2, COL2A1, CD24, DST | HES1, BARX2, DSG2, PDPN, ITGB4, COL2A1, CELSR1, RADIL, PARVB, SYK |
| G0:0022610~biological adhesion               | LPXN, DSG2, COL3A1, ITGA7, HSPG2, COL2A1, CD24, DST | HES1, BARX2, DSG2, PDPN, ITGB4, COL2A1, CELSR1, RADIL, PARVB, SYK |
